# Supplementary material for: LncRNA Gm14205 induces astrocytic NLRP3 inflammasome activation via inhibiting oxytocin receptor in postpartum depression
Source: Oxford University Press journal article supplement (doi:10.1042/bsr20200672), 2020-07-24
Supplement: bsr-2020-0672_supp.pdf [file bsr-2020-0672_supp.pdf]

**Supplementary Table. Differentially expressed genes between control and PPD groups**

| id                 | type   | name          | log2FC(GD/GC) | pval     | fdr         | regulate |
|--------------------|--------|---------------|---------------|----------|-------------|----------|
| ENSMUSG00000054074 | mRNA   | Skida1        | -4.059131148  | 4.22E-47 | 7.25E-43    | down     |
| ENSMUSG00000053004 | mRNA   | Hrh1          | 2.816998418   | 6.35E-16 | 5.45E-12    | up       |
| ENSMUSG00000038178 | mRNA   | Slc43a2       | 1.403245835   | 1.44E-15 | 8.24E-12    | up       |
| ENSMUSG00000032484 | mRNA   | Ngp           | -3.032195491  | 7.20E-13 | 3.09E-09    | down     |
| ENSMUSG00000103677 | mRNA   | Pcdhga4       | -2.444296501  | 1.31E-12 | 4.50E-09    | down     |
| ENSMUSG00000090031 | lncRNA | 4732440D04Rik | 2.641215914   | 3.16E-12 | 9.03E-09    | up       |
| ENSMUSG00000038145 | mRNA   | Snrk          | 1.131226533   | 7.87E-12 | 1.93E-08    | up       |
| ENSMUSG00000109754 | lncRNA | Gm39214       | -2.672129766  | 5.69E-10 | 1.22E-06    | down     |
| ENSMUSG00000066735 | mRNA   | Vkorc111      | -1.225006946  | 9.43E-09 | 1.80E-05    | down     |
| ENSMUSG00000087563 | lncRNA | Gm14205       | 7.723717533   | 2.09E-08 | 3.59E-05    | up       |
| ENSMUSG00000045573 | mRNA   | Penk          | -1.498798792  | 1.15E-06 | 0.001646706 | down     |
| ENSMUSG00000094695 | mRNA   | Gm21953       | 4.894733705   | 1.36E-06 | 0.001801382 | up       |
| ENSMUSG00000027852 | mRNA   | Nras          | -1.589186742  | 4.09E-06 | 0.004579247 | down     |
| ENSMUSG00000041534 | mRNA   | Rbp3          | -1.341444052  | 4.27E-06 | 0.004579247 | down     |
| ENSMUSG00000005892 | mRNA   | Trh           | 2.139362423   | 8.39E-06 | 0.008470327 | up       |
| ENSMUSG00000049421 | mRNA   | Zfp260        | -1.758463962  | 1.02E-05 | 0.009235512 | down     |
| ENSMUSG00000053119 | mRNA   | Chmp3         | -1.164333628  | 1.15E-05 | 0.00984957  | down     |
| ENSMUSG00000093989 | mRNA   | Rnasek        | 1.358751263   | 1.56E-05 | 0.012731231 | up       |
| ENSMUSG00000035829 | mRNA   | Ppp1r26       | 1.48530434    | 1.79E-05 | 0.013958752 | up       |
| ENSMUSG00000029711 | mRNA   | Epo           | -4.305005399  | 2.88E-05 | 0.021068064 | down     |
| ENSMUSG00000045238 | lncRNA | A730035I17Rik | -1.926173533  | 2.94E-05 | 0.021068064 | down     |
| ENSMUSG00000075334 | mRNA   | Rprm          | -1.171088864  | 3.36E-05 | 0.022167348 | down     |
| ENSMUSG00000049281 | mRNA   | Scn3b         | 1.19790544    | 3.36E-05 | 0.022167348 | up       |
| ENSMUSG00000042523 | mRNA   | Dnal1         | 1.9593073     | 4.40E-05 | 0.027001684 | up       |
| ENSMUSG00000038797 | mRNA   | Zscan2        | 1.485104121   | 5.47E-05 | 0.03132668  | up       |
| ENSMUSG00000104674 | lncRNA | Gm42756       | 1.531618517   | 5.83E-05 | 0.032296743 | up       |
| ENSMUSG00000001119 | mRNA   | Col6a1        | -1.139747859  | 7.57E-05 | 0.038251241 | down     |

**Supplementary Table. Differentially expressed genes between control and PPD groups**

To avoid false positive errors, multiple test correction method was used to correct the significant

p-value obtained from the original hypothesis test, and finally false discovery rate (FDR) was used as

key index for screening differentially expressed genes.  $FDR < 0.05$
